# Supplementary material
Source: PubMed Central journal article supplement (PMC3295314)
Supplement: 1108517109_pnas.201108517SI.pdf [file 1108517109_pnas.201108517SI.pdf]

# Supporting Information

Yamamoto et al. 10.1073/pnas.1108517109

**Table S1. Object offer by each individual**

|                      | Ai    |       |       | Cleo  |       |       | Pal   |       |       | Ayumu |       |       | Pan   |       |       |       |    |    |   |    |    |    |   |    |    |    |    |   |   |   |
|----------------------|-------|-------|-------|-------|-------|-------|-------|-------|-------|-------|-------|-------|-------|-------|-------|-------|----|----|---|----|----|----|---|----|----|----|----|---|---|---|
|                      | 1     | 2     | 3     | 1     | 2     | 3     | 1     | 2     | 3     | 1     | 2     | 3     | 1     | 2     | 3     |       |    |    |   |    |    |    |   |    |    |    |    |   |   |   |
| Object owner:        | Stick | Straw |    |    |   |    |    |    |   |    |    |    |    |   |   |   |
| Condition:           | 14    | 6     | 19    | 20    | 18    | 14    | 8     | 2     | 9     | 8     | 15    | 3     | 19    | 10    | 8     | 3     | 12 | 2  | 8 | 2  | 18 | 2  | 8 | 2  | 18 | 2  | 2  | 3 | 6 | 8 |
| Partner's situation: | 7     | 15    | 1     | 2     | 0     | 7     | 11    | 17    | 12    | 11    | 7     | 19    | 3     | 11    | 16    | 21    | 12 | 21 | 5 | 17 | 3  | 17 | 3 | 17 | 3  | 17 | 0  | 2 | 2 | 5 |
| Others               | 3     | 3     | 3     | 2     | 6     | 3     | 1     | 0     | 3     | 2     | 1     | 1     | 2     | 1     | 0     | 0     | 0  | 0  | 8 | 1  | 1  | 1  | 2 | 20 | 17 | 15 | 11 |   |   |   |
| No offer             | 0     | 0     | 1     | 0     | 0     | 0     | 4     | 5     | 0     | 3     | 1     | 1     | 0     | 2     | 0     | 0     | 0  | 1  | 3 | 4  | 2  | 3  | 4 | 2  | 3  | 2  | 2  | 1 | 0 |   |

The first row represents the object owner (i.e., the potential helper). The second row represents the experimental condition: 1—"can see" condition; 2—"cannot see" condition; 3—second "can see" condition (not applicable to Ayumu and Pan). The third row details which tool-use situation the recipient was confronted with. The remaining four rows below summarize the frequency of the first offer for each object type. "Others" included the five nontool objects. Data in boldface type indicate that the owner's offer matched the recipient's need.

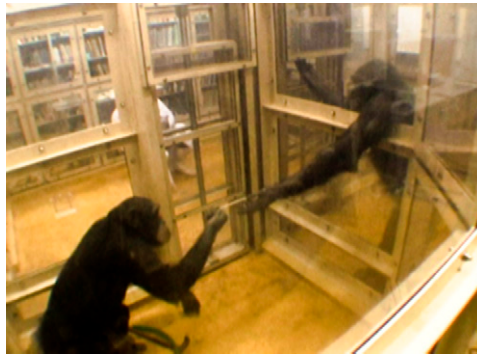

**Movie S1.** Appropriate first tool offer in the “can see” condition. Upon the request of Pan (chimpanzee on the right), Pal transferred a straw, which Pan used to successfully obtain a juice reward.

[Movie S1](#)

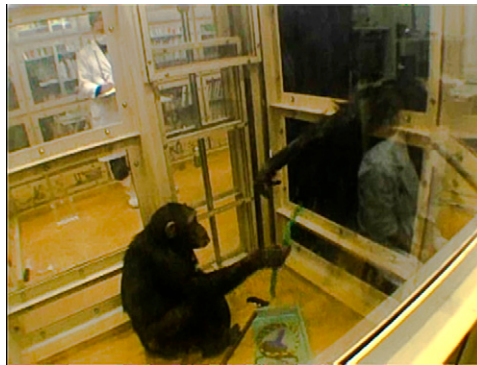

**Movie S2.** Inappropriate first tool offer in the “cannot see” condition. Cleo (chimpanzee on the left) first offered a straw to Chloe. As Chloe continued requesting, Cleo transferred a hose, a brush, and finally a stick, which Chloe actually required.

[Movie S2](#)
